# Supplementary material for: Artisanal Green Turtle, Chelonia mydas, Fishery of Caribbean Nicaragua: I. Catch Rates and Trends, 1991–2011
Source: PLOS journal article supplement (doi:10.1371/journal.pone.0094667), 2014-04-16

**Figure S2. Correlation in residuals ordered in time with lag time in days for the overall trend models including seasonality using landings in (A) principal green turtle, *Chelonia mydas*, fishing communities, (B) commercial center for the Awastara community, and (C) communities using the Refugio de Vida Silvestre Cayos Perlas fishing area.**

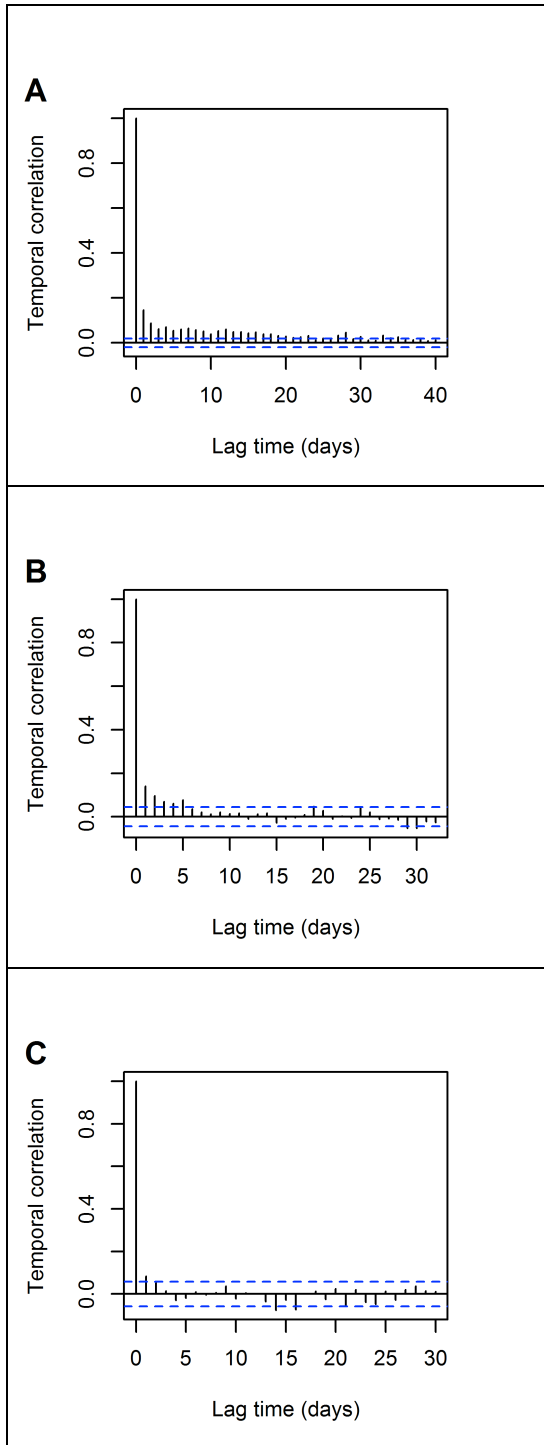

Supplement: S2 (10.1371/journal.pone.0094667.s002) [file journal.pone.0094667.s002]
